# Supplementary material
Source: PubMed Central journal article supplement (PMC9638853)
Supplement: EMBR-23-e55671-s009.pdf [file EMBR-23-e55671-s009.pdf]

# Appendix Supplementary Information for

## Neighboring mutation-mediated enhancement of dengue virus infectivity and spread

Lu Chen<sup>1,#</sup>, Xianwen Zhang<sup>2,#</sup>, Xuan Guo<sup>1,#</sup>, Wenyu Peng<sup>1,#</sup>, Yibin Zhu<sup>1</sup>, Zhaoyang Wang<sup>1</sup>, Xi Yu<sup>1</sup>, Huicheng Shi<sup>1</sup>, Yuhan Li<sup>1</sup>, Liming Zhang<sup>1</sup>, Lei Wang<sup>2</sup>, Penghua Wang<sup>3</sup>, and Gong Cheng<sup>1,2,\*</sup>

\*Correspondence: [gongcheng@mail.tsinghua.edu.cn](mailto:gongcheng@mail.tsinghua.edu.cn)

### Table of Contents:

|                                    |    |
|------------------------------------|----|
| Appendix Figure S1.....            | 2  |
| Appendix Figure S2.....            | 3  |
| Appendix Table S1.....             | 4  |
| Appendix Table S2.....             | 5  |
| Appendix Table S3.....             | 6  |
| Appendix Table S4.....             | 8  |
| Appendix Table S5.....             | 9  |
| Appendix Table S6.....             | 10 |
| Appendix Supplementary Text 1..... | 11 |

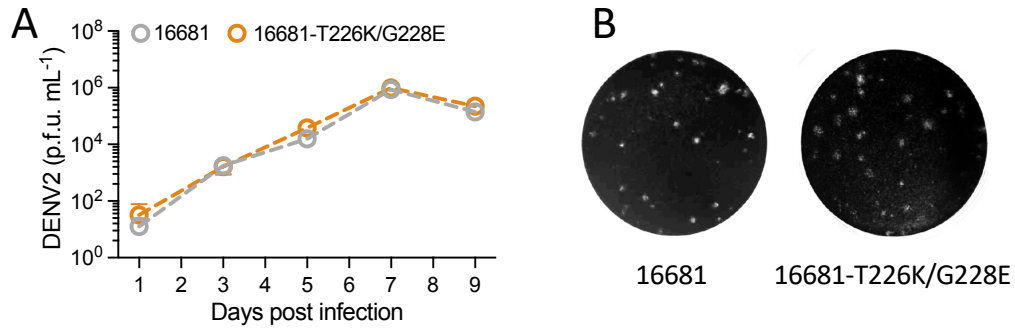

**Appendix Figure S1. Growth kinetics and plaque morphology of the 16681-T226K/G228E mutant.**

A Growth kinetics of the 16681-T226K/G228E mutant in Vero cells. Vero cells were infected with 0.01 MOI of viruses, and the cell supernatant was collected at Days 1, 3, 5, 7, and 9 for the plaque assay.

B Plaque morphology of the 16681 and 16681-T226K/G228E strains.

Data information: In (A), data are presented as mean  $\pm$  SEM of n = 4 biological replicates.

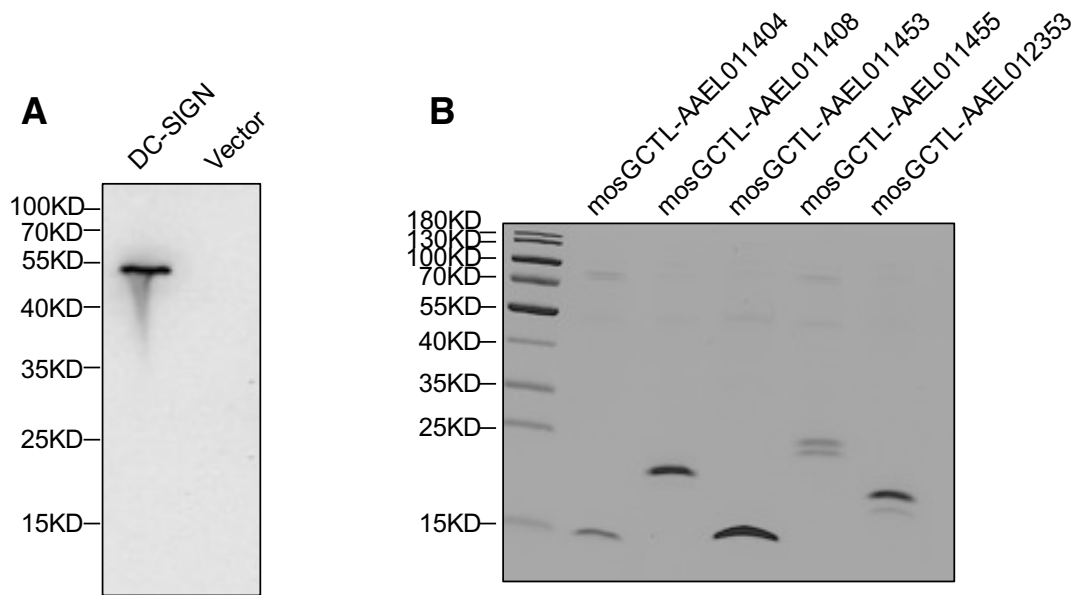

**Appendix Figure S2. Expression of DC-SIGN and mosquito C-type lectins.**

A Expression of human DC-SIGN in 293T cells. The 293T cells were transfected with a pcDNA3.1 recombinant plasmid with a human *DC-SIGN* gene. Thirty-six hours after transfection, the cells were lysed, and the expression of human DC-SIGN was detected by western blotting with an anti-flag antibody.

B Purification of mosquito C-type lectins in S2 cells. The protein concentration was measured using protein assay dye, and the protein purity was verified by SDS-polyacrylamide gel electrophoresis (PAGE).

**Appendix Table S1. Sequence number of the DENV1-4 E proteins.**

| <b>Serotype</b> | <b>Genotype</b>              | <b>&lt;1995</b> | <b>1996-2000</b> | <b>2001-2005</b> | <b>2006-2010</b> | <b>2011-2015</b> | <b>2016-2020</b> | <b>N/A</b> |
|-----------------|------------------------------|-----------------|------------------|------------------|------------------|------------------|------------------|------------|
| <b>DENV1</b>    | <b>I</b>                     | 72              | 42               | 240              | 1534             | 1339             | 1366             | 378        |
|                 | <b>II</b>                    | 3               | 0                | 0                | 0                | 1                | 0                | 0          |
|                 | <b>III</b>                   | 1               | 0                | 0                | 0                | 0                | 0                | 2          |
|                 | <b>IV</b>                    | 10              | 4                | 132              | 223              | 255              | 86               | 79         |
|                 | <b>V</b>                     | 77              | 116              | 110              | 470              | 1366             | 409              | 20         |
| <b>DENV2</b>    | <b>Asian I</b>               | 94              | 38               | 146              | 313              | 467              | 54               | 134        |
|                 | <b>Asian II</b>              | 9               | 0                | 1                | 17               | 2                | 3                | 8          |
|                 | <b>Asian American</b>        | 125             | 133              | 277              | 371              | 226              | 90               | 112        |
|                 | <b>Cosmopolitan American</b> | 27              | 42               | 160              | 612              | 1147             | 932              | 9          |
|                 | <b>American</b>              | 49              | 2                | 1                | 1                | 0                | 0                | 24         |
|                 | <b>Sylvatic</b>              | 15              | 1                | 0                | 2                | 0                | 0                | 4          |
| <b>DENV3</b>    | <b>I</b>                     | 79              | 25               | 29               | 126              | 245              | 140              | 34         |
|                 | <b>II</b>                    | 55              | 57               | 86               | 193              | 196              | 0                | 58         |
|                 | <b>III</b>                   | 24              | 62               | 394              | 440              | 269              | 133              | 138        |
|                 | <b>IV</b>                    | 0               | 0                | 0                | 0                | 0                | 0                | 3          |
|                 | <b>V</b>                     | 4               | 0                | 3                | 4                | 3                | 0                | 0          |
| <b>DENV4</b>    | <b>I</b>                     | 12              | 0                | 70               | 78               | 200              | 210              | 58         |
|                 | <b>II</b>                    | 34              | 60               | 46               | 288              | 649              | 56               | 158        |
|                 | <b>III</b>                   | 0               | 2                | 0                | 0                | 0                | 0                | 5          |
|                 | <b>Sylvatic</b>              | 3               | 0                | 0                | 0                | 0                | 0                | 3          |

**Appendix Table S2. Time-series data of the AOF of T226K and G228E substitutions in the DENV2 Asian I genotype from 1995 to 2019.**

| <b>Year</b> | <b>t</b> | <b>The AOF of T226K (%)</b> | <b>The AOF of G228E (%)</b> |
|-------------|----------|-----------------------------|-----------------------------|
| 1995        | 0        | 28.57                       | 0                           |
| 1996        | 1        | 27.27                       | 0                           |
| 1997        | 2        | 20                          | 0                           |
| 1998        | 3        | 11.11                       | 0                           |
| 1999        | 4        | 14.29                       | 14.29                       |
| 2000        | 5        | 42.86                       | 14.29                       |
| 2001        | 6        | 60.71                       | 46.43                       |
| 2002        | 7        | 66.67                       | 66.67                       |
| 2003        | 8        | 100                         | 69.23                       |
| 2004        | 9        | 92.86                       | 85.71                       |
| 2005        | 10       | 100                         | 88.89                       |
| 2006        | 11       | 98.33                       | 100                         |
| 2007        | 12       | 100                         | 96.39                       |
| 2008        | 13       | 100                         | 92.86                       |
| 2009        | 14       | 100                         | 100                         |
| 2010        | 15       | 100                         | 98.7                        |
| 2011        | 16       | 99.4                        | 99.4                        |
| 2012        | 17       | 98.66                       | 98.66                       |
| 2013        | 18       | 95.59                       | 95.59                       |
| 2014        | 19       | 85                          | 85                          |
| 2015        | 20       | 80.65                       | 79.03                       |
| 2016        | 21       | 100                         | 100                         |
| 2017        | 22       | 100                         | 100                         |
| 2018        | 23       | 100                         | 100                         |
| 2019        | 24       | 94.44                       | 100                         |

**Appendix Table S3. Primers for qPCR and clones.**

| <b>Primers for SYBR RT-QPCR</b>              | <b>Upper primer</b>                                              | <b>Lower primer</b>                          |
|----------------------------------------------|------------------------------------------------------------------|----------------------------------------------|
| DENV2 <i>capsid</i>                          | CAGATCTCTGATGAATAACCAACG                                         | CATTCCAAGTGAGAATCTCTTTGTCA                   |
| DENV3 <i>envelope</i>                        | ATGGAATGTGTGGGAGGTGG                                             | GGCTTTCTATCCARTAGCCCATG                      |
| DENV4 <i>capsid</i>                          | GCAGATCTCTGGAAAAATGAACCA                                         | GAGAATCTCTTCACCAACCCYTG                      |
| <i>Aedes aegypti Actin</i>                   | GAACACCCAGTCCTGCTGACA                                            | TGCGTCATCTTCTCACGGTTAG                       |
| <i>Homo sapiens GAPDH</i>                    | AGCCTCAAGATCATCAGCAATG                                           | ATGGACTGTGGTCATGAGTCCTT                      |
| <i>Mus musculus GAPDH</i>                    | TGCTGAGTATGTCGTGGAGTC                                            | GGTTCACACCCATCACAAAC                         |
| <b>Primers for cloning into pcDNA3.1 (+)</b> | <b>Upper primer</b>                                              | <b>Lower primer</b>                          |
| DC-SIGN                                      | GGCTAGTTAAGCTTGGTACCATGAGTGACTCCAAGGAACC                         | TCGTCGTCATCCTTGTAATCCGCAGGAGGG<br>GGGTTTGGGG |
| <b>Primers for cloning into pET28a</b>       | <b>Upper primer</b>                                              | <b>Lower primer</b>                          |
| DC-SIGN ectodomain                           | GTCGACAAGCTTGCGGCCGCGTGTCCAAGGTCCCCAGCTC                         | TGGTGGTGGTGGTGCTCGAGCGCAGGAGGG<br>GGGTTTGGGG |
| <b>Primers for infectious clones</b>         | <b>Upper primer</b>                                              | <b>Lower primer</b>                          |
| BID-V1164 fragment1                          | ATATATCCTGTATCACATATTCTGCGGCCGCTAATACGACTCACT<br>ATAGAGTTGTTAGTC | CTAATGTCTCCTGTCATAATGGTCAACTTTA<br>CCTC      |
| BID-V1164 fragment2                          | GACCATTATGACAGGAGACATTAGAGGAATC                                  | TCTACTCGAGTTGAAATGTATCCTCTAGC                |
| BID-V1164 fragment3                          | GAGGATACATTTCAACTCGAGTAGAGATGGGTGAAGCAG                          | CGACGAACCATCTCAGTTTTGC                       |
| BID-V1164 fragment4                          | GCAAAACTGAGATGGTTCGTCTG                                          | CCATTCCATTTTCTGGCGTTCTG                      |

**Appendix Table S3. Primers for qPCR and clones (Continued).**

| <b>Primers for infectious clones</b> | <b>Upper primer</b>                                              | <b>Lower primer</b>                                              |
|--------------------------------------|------------------------------------------------------------------|------------------------------------------------------------------|
| 16681 fragment1                      | TTAATACGACTCACTATAGAGTTGTTAGTCTACGTG<br>GAC                      | CTGGTCCAGCGAGATTCTTTGGAATTATCATCTCAC                             |
| 16681 fragment2                      | GAGATGATAATTCCAAAGAATCTCGCTGGACCAGTG                             | CTCTTGCCTTCTGAGTCATGAAGGTTGGGAGCC                                |
| 16681 fragment3                      | GGCTCCCAACCTTCATGACTCAGAAGGCAAGAG                                | TGTCCAAATGGAGTCGTGTCTGTCATTG                                     |
| 16681 fragment4                      | CAATGACAGACACGACTCCATTTGGACA                                     | TGCCTGCAGGTCGACTCTAGAGAACCTGTTGATTCAA<br>CAG                     |
| PF89/27643 fragment1                 | CATTATACGAAGTTATATTCGATGCGGCCGCTAATAC<br>GACTCACTATAGAGTTGTTAGTC | CATTATACGAAGTTATATTCGATGCGGCCGCTAATAC<br>GACTCACTATAGAGTTGTTAGTC |
| PF89/27643 fragment2                 | GTGTGCGGAATCAGGTCGAC                                             | CTCATCCATTACTATCAAGTTGTAGTTTGG                                   |
| PF89/27643 fragment3                 | CTACAACCTTGATAGTAATGGATGAGGC                                     | GGATCCATGGTAAGCCCACG                                             |
| PF89/27643 fragment4                 | CGTGCGGCTTACCATGGATCC                                            | CAGAACCTGTTGATTCAACAGCAC                                         |
| H241 fragment1                       | CATTATACGAAGTTATATTCGATGCGGCCGCTAATAC<br>GACTCACTATAGGGTCGTGTGG  | GCTTGTCTGCATAAAGGAATGAGTG                                        |
| H241 fragment2                       | CATTCCTTTATGCAGGACAAGC                                           | GACCAAACAATGTTGGAATGATCCC                                        |
| H241 fragment3                       | GGGATCATTCCAACATTGTTTGGTCCG                                      | GATGTTGTGTTTACAGAGCTCACGA                                        |
| H241 fragment4                       | TCGTGAGCTCTGTAAACACAACATC                                        | CTCAACAACACCAATCCATCTCG                                          |

**Appendix Table S4. The hyperparameters of the support vector machine regression (SVR) and Gaussian process regression (GPR) models.**

| <b>Model</b> | <b>Hyperparameters</b> | <b>Description and function equation</b>                                                                                                                                                                                                                                                                                                                                                                                                                                                                                                                                                                                       |
|--------------|------------------------|--------------------------------------------------------------------------------------------------------------------------------------------------------------------------------------------------------------------------------------------------------------------------------------------------------------------------------------------------------------------------------------------------------------------------------------------------------------------------------------------------------------------------------------------------------------------------------------------------------------------------------|
| <b>SVR</b>   | <b>Kernel function</b> | Polynomials kernel function: $(1+xx_k)^p$ ; Radial basis function (Gaussian): $\exp(-\ x-x_k\ ^2/2\sigma^2)$ ; Multilayer perceptron or sigmoid: $\tanh(p_1xx_k+p_2)$ , where $x$ and $x_k$ are vectors in the input space, $p > 0$ , $p_1 > 0$ , $p_2 < 0$ , $\sigma > 0$ are parameters, and $p$ is an integer.                                                                                                                                                                                                                                                                                                              |
|              | <b>Epsilon</b>         | Half the width of the epsilon-insensitive band, stored as a nonnegative scalar value.                                                                                                                                                                                                                                                                                                                                                                                                                                                                                                                                          |
|              | <b>Kernel scale</b>    | Numeric scale factor used to divide predictor values.                                                                                                                                                                                                                                                                                                                                                                                                                                                                                                                                                                          |
|              | <b>Box constraint</b>  | Box constraints for dual problem alpha coefficients, stored as a numeric vector containing $n$ elements, where $n$ is the number of observations in $x$ .                                                                                                                                                                                                                                                                                                                                                                                                                                                                      |
| <b>GPR</b>   | <b>Kernel function</b> | Exponential kernel function: $\sigma^2\exp(-(x-x')/l)$ ; Rational quadratic kernel function: $\sigma^2(1+(x-x')^2/2al)^{-a}$ ; Squared Exponential kernel function: $\sigma^2\exp(-(x-x')^2/l^2)$ ; Matern kernel function: $\sigma^22^{1-\nu}/\Gamma(\nu)((2\nu)^{0.5}(x-x')/l)^\nu K_\nu((2\nu)^{0.5}(x-x')/l)$ ; where $x$ and $x'$ are vectors in the input space, $l$ is the characteristic length scale, $a$ is the positive-valued scale-mixture parameter, $\sigma^2$ is the signal standard deviation, $K_\nu$ is the modified Bessel function and $\nu$ is a positive parameter, and $\Gamma$ is the gamma function. |
|              | <b>Sigma</b>           | Predictor standard deviations, stored as a vector of numeric values.                                                                                                                                                                                                                                                                                                                                                                                                                                                                                                                                                           |
|              | <b>Kernel scale</b>    | Numeric scale factor used to divide predictor values.                                                                                                                                                                                                                                                                                                                                                                                                                                                                                                                                                                          |



**Appendix Table S5. The model parameters and statistical parameters.**

| <b>Model</b>                                  | <b>Model parameters</b>                                | <b>Pearson r</b> | <b>p</b> |
|-----------------------------------------------|--------------------------------------------------------|------------------|----------|
| Numerical kinetics model for the AOF of T226K | $K_{a226}=0.00364;$<br>$K_{d226}=0.168; k_{t226}=2.86$ | 0.975            | < 0.0001 |
| Numerical kinetics model for the AOF of G228E | $K_{a228}=0.0657;$<br>$K_{d228}=0.024; k_{t228}=2.36$  | 0.979            | < 0.0001 |
| GPR-1 model for the AOF of T226K              | -                                                      | 0.975            | < 0.0001 |
| GPR-1 model for the AOF of G228E              | -                                                      | 0.985            | < 0.0001 |
| SVR model for the AOF of T226K                | -                                                      | 0.973            | < 0.0001 |
| SVR model for the AOF of G228E                | -                                                      | 0.986            | <0.0001  |

**Appendix Table S6. The input data and output data for training the Gaussian process regression (GPR-2) model.**

| t  | Input data           |                      | Output data                             |
|----|----------------------|----------------------|-----------------------------------------|
|    | The AOF of T226K (%) | The AOF of G228E (%) | The prevalence of the DENV2-Asian I (%) |
| 3  | 11.11                | 0                    | 13.79                                   |
| 4  | 14.29                | 14.29                | 19.44                                   |
| 5  | 42.86                | 14.29                | 13.73                                   |
| 8  | 100                  | 69.23                | 14.44                                   |
| 9  | 92.86                | 85.71                | 32.18                                   |
| 10 | 100                  | 88.89                | 11.92                                   |
| 11 | 98.33                | 100                  | 35.29                                   |
| 12 | 100                  | 96.39                | 26.77                                   |
| 13 | 100                  | 92.86                | 20.51                                   |
| 14 | 100                  | 100                  | 18.97                                   |
| 15 | 100                  | 98.7                 | 20.92                                   |
| 16 | 99.4                 | 99.4                 | 45.9                                    |
| 17 | 98.66                | 98.66                | 40.71                                   |
| 18 | 95.59                | 95.59                | 21.18                                   |
| 19 | 85                   | 85                   | 8.3                                     |
| 20 | 80.65                | 79.03                | 11.31                                   |
| 21 | 100                  | 100                  | 5.39                                    |
| 22 | 100                  | 100                  | 2.18                                    |
| 23 | 100                  | 100                  | 6.42                                    |
| 24 | 94.44                | 100                  | 12.59                                   |

## Appendix Supplementary Text 1

### Numerical kinetics modeling of the AOF of T226K/G228E substitutions

The kinetics of the AOF of the T226K/G228E substitution in the DENV2 Asian I genotype are described by Equations 1-2:

$$\frac{(\text{The AOF of T226K})}{dt} = R_{a226} - R_{b226} \quad 1$$

$$\frac{(\text{The AOF of G228E})}{dt} = R_{a228} - R_{b228} \quad 2$$

where  $t$  is the number of years from 1995,  $R_{a226}$  ( $\text{year}^{-1}$ ) is the substitution rate of T with K at the 226<sup>th</sup> residue,  $R_{a228}$  ( $\text{year}^{-1}$ ) is the substitution rate of G with E at the 228<sup>th</sup> residue,  $R_{b226}$  ( $\text{year}^{-1}$ ) is the substitution rate of K with another amino acid at the 226<sup>th</sup> residue, and  $R_{b228}$  ( $\text{year}^{-1}$ ) is the substitution rate of E with another amino acid at the 228<sup>th</sup> residue.

$R_{a226}$  is proportional to the AOF of 226T:

$$R_{a226} \propto (\text{The AOF of 226WT}) \quad 3$$

$$\text{The AOF of 226WT} = 100\% - (\text{The AOF of T226K}) \quad 4$$

We assumed that  $R_{a226}$  is proportional to the power of  $t$ :

$$R_{a226} \propto t^{k_{t226}} \quad 5$$

where  $k_{t226}$  is the exponential constant of  $t$ .

Combining Equations 3-5 yields:

$$R_{a226} = k_{a226}(100\% - (\text{The AOF of T226K}))t^{k_{t226}} \quad 6$$

where  $k_{a226}$  ( $\text{year}^{-1-k_{t226}}$ ) is the rate constant of the T226K substitution.

$R_{b226}$  is proportional to the AOF of T226K substitution:

$$R_{b226} = k_{b226}(\text{The AOF of T226K}) \quad 7$$

where  $k_{b226}$  ( $\text{year}^{-1}$ ) is the rate constant of the substitution of K with another amino acid at the 226<sup>th</sup> residue.

Combining Equations 1, 6, and 7 yields:

$$\frac{d(\text{The AOF of T226K})}{dt} = k_{a226}(100\% - (\text{The AOF of T226K}))t^{k_{t226}} -$$

$$k_{b226}(\text{The AOF of T226K}) \quad 8$$

Equation 8 is the theoretical kinetics model for the AOF of the T226K substitution.

As with the  $R_{a226}$ ,  $R_{a228}$  is proportional to the AOF of 228G and the power of  $t$ :

$$R_{a228} \propto (\text{The AOF of 228WT}) \quad 9$$

$$\text{The AOF of 228WT} = 100\% - (\text{The AOF of G228E}) \quad 10$$

$$R_{a228} \propto t^{k_{t228}} \quad 11$$

where  $k_{t228}$  is the exponential constant of  $t$ .

Given that the G228E substitution compensatorily occurs based on the T226K mutation in the DENV2 Asian I genotype, we assumed that the AOF of the G228E substitution is also proportional to the AOF of the T226K substitution and the difference between the AOF of T226K and the AOF of G228E substitutions:

$$R_{a228} \propto (\text{The AOF of T226K}) \quad 12$$

$$R_{a228} \propto ((\text{The AOF of T226K}) - (\text{The AOF of G228E})) \quad 13$$

Combining Equations 9-13 yields:

$$R_{a228} = k_{a228}((\text{The AOF of T226K}) - (\text{The AOF of G228E}))(\text{The AOF of T226K})(100\% - (\text{The AOF of G228E}))t^{k_{t228}} \quad 14$$

where  $k_{a228}$  ( $\text{year}^{-1-k_{t228}}$ ) is the rate constant of G228E substitution.

$R_{b228}$  is proportional to the AOF of G228E substitution:

$$R_{b228} = k_{b228}(\text{The AOF of G228E}) \quad 15$$

where  $k_{b228}$  ( $\text{year}^{-1}$ ) is the rate constant of the substitution of E with another amino acid at the 228<sup>th</sup> residue.

Combining Equations 1, 14, and 15 yields

$$\frac{d(\text{The AOF of G228E})}{dt} = k_{a228}((\text{The AOF of T226K}) - (\text{The AOF of G228E}))(\text{The AOF of T226K})(100\% - (\text{The AOF of G228E}))t^{k_{t228}} - k_{b228}(\text{The AOF of G228E}) \quad 16$$

Equation 16 is the theoretical kinetics model for the AOF of the G228E substitution.
